# Supplementary material for: Short-term exposure to positively charged polystyrene nanoparticles causes oxidative stress and membrane destruction in cyanobacteria
Source: Royal Society of Chemistry journal article supplement (doi:10.1039/c9en00807a), 2019-01-01
Supplement: c9en00807a1.pdf [file c9en00807a1.pdf]

## Supplementary Information

### **Short-term exposure of positively charged polystyrene nanoparticles causes oxidative stress and membrane destruction in cyanobacteria**

Li-Juan Feng<sup>a#</sup>, Jian-Wei Li<sup>a#</sup>, Elvis Genbo Xu<sup>b</sup>, Xiao-Dong Sun<sup>a</sup>, Fan-Ping Zhu<sup>a</sup>, Zhao-Jun Ding<sup>c</sup>, Hui-Yu Tian<sup>c</sup>, Shang-Shang Dong<sup>a</sup>, Peng-Fei Xia<sup>a</sup>, and Xian-Zheng Yuan<sup>a\*</sup>

<sup>a</sup> Shandong Key Laboratory of Water Pollution Control and Resource Reuse, School of Environmental Science and Engineering, Shandong University, Qingdao, Shandong Province 266237, P. R. China

<sup>b</sup> Department of Chemical Engineering, McGill University, Montreal, Quebec, Canada H3A 0C5

<sup>c</sup> The Key Laboratory of Plant Cell Engineering and Germplasm Innovation, Ministry of Education, School of Life Science, Shandong University, Qingdao, Shandong 266237, P. R. China

# These authors contributed equally to this work.

#### **Summary**

**Total 13 pages**

**7 figures**

**5 tables**

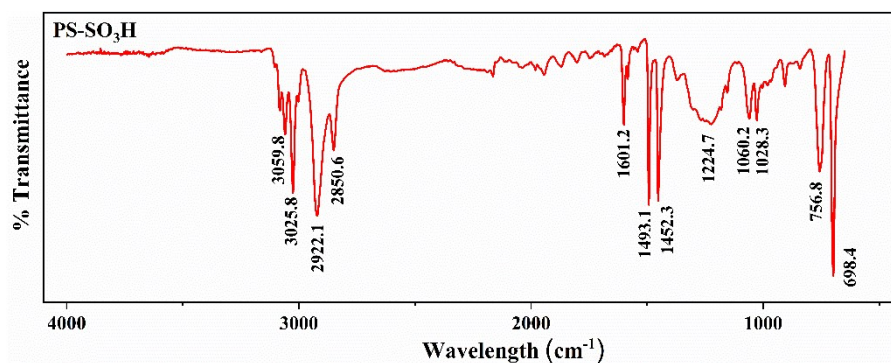

**Figure S1** FTIR spectra of PS-SO<sub>3</sub>H after exposure to deionized water a for two days. A series of strong peaks at 3026, 2921, 1601, 1493, 1452, 757 and 698 cm<sup>-1</sup> correspond to the characteristic peaks of benzene in nanoplastics <sup>1</sup>.

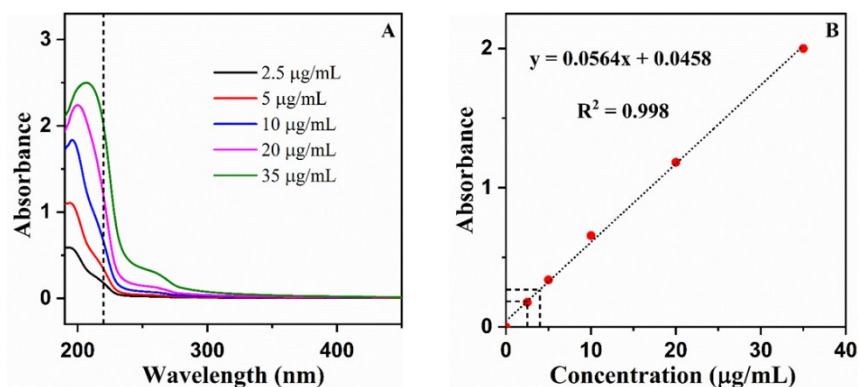

**Figure S2** The concentration of PS-NH<sub>2</sub> was detected via UV-Vis spectra. UV-Vis spectra of PS-NH<sub>2</sub> with different concentrations in deionized water (A). The absorbance of PS-NH<sub>2</sub> at 220 nm is fitted to its concentration in deionized water (B).

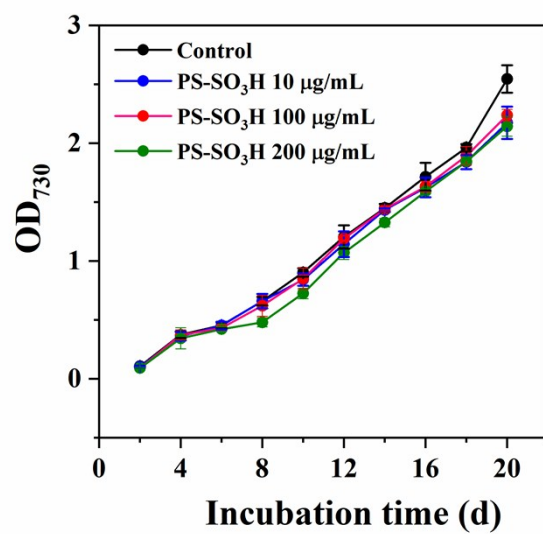

**Figure S3** Effects of different concentrations of PS-SO<sub>3</sub>H on the cell density of *S. elongatus* PCC 7942.

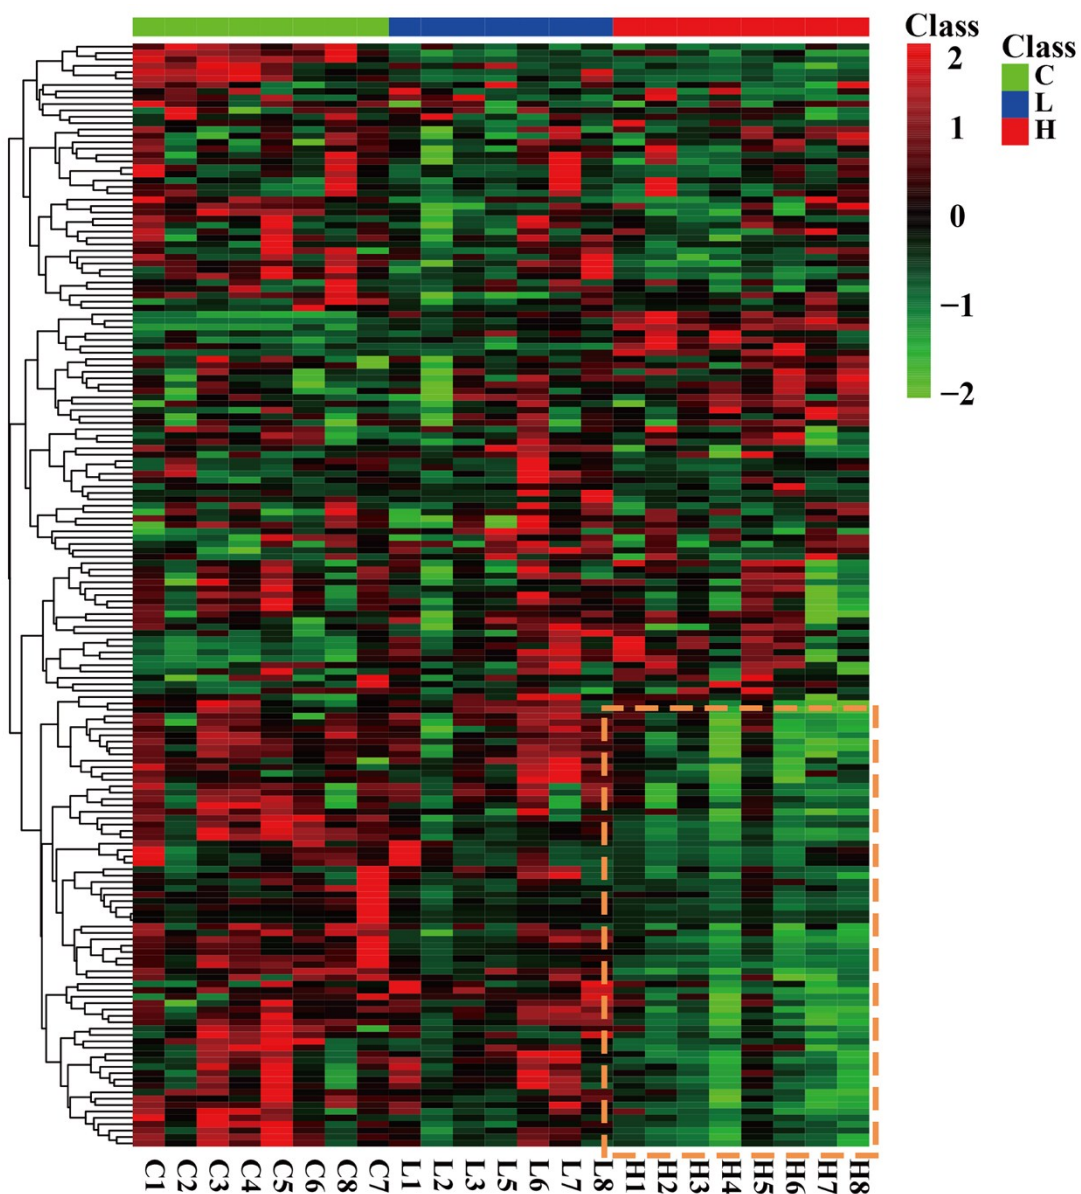

**Figure S4** The hierarchical clustering heat map presents a global view of metabolite changes in *Synechococcus* exposed to different concentrations of PS-NH<sub>2</sub> and control. Significantly inhibited metabolites are circled by a dotted orange box. “C” refers to the control group. “L” and “H” refer to low and high concentrations of PS-NH<sub>2</sub>, respectively.

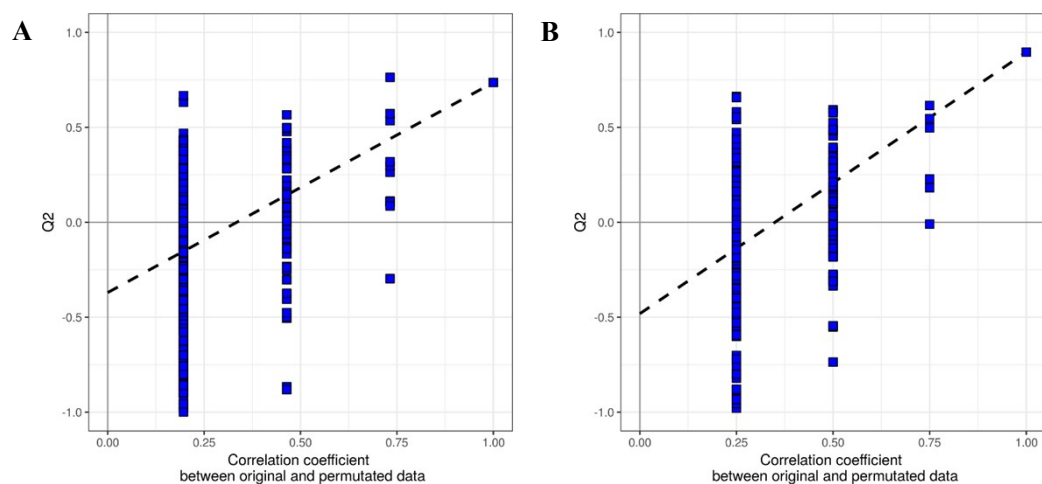

**Figure S5** The permutation testing was employed to assess validation of the classification mode. “A” for assessing OPLS-DA model of low concentration group vs control group, “B” for assessing OPLS-DA model of high concentration group vs control group. The intercept of  $Q_2Y$  with a threshold less than zero indicates a valid model.

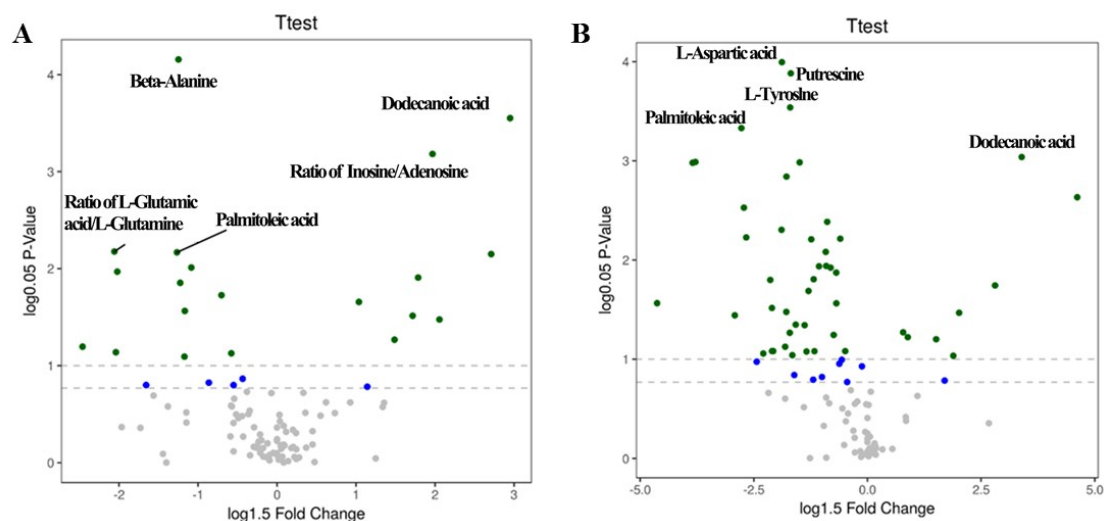

**Figure S6** An enhanced volcano plot showed the differential metabolites selected with the multicriteria assessment. The differential metabolites were obtained using univariate statistical analysis, student T-test. “A” for low concentration group vs control group, “B” for high concentration group vs control group. The p-value together with log 1.5 (fold change) are introduced with a cutoff value of 0.05, 0.01 for p value and 1.5 for log1.5 FC, respectively.

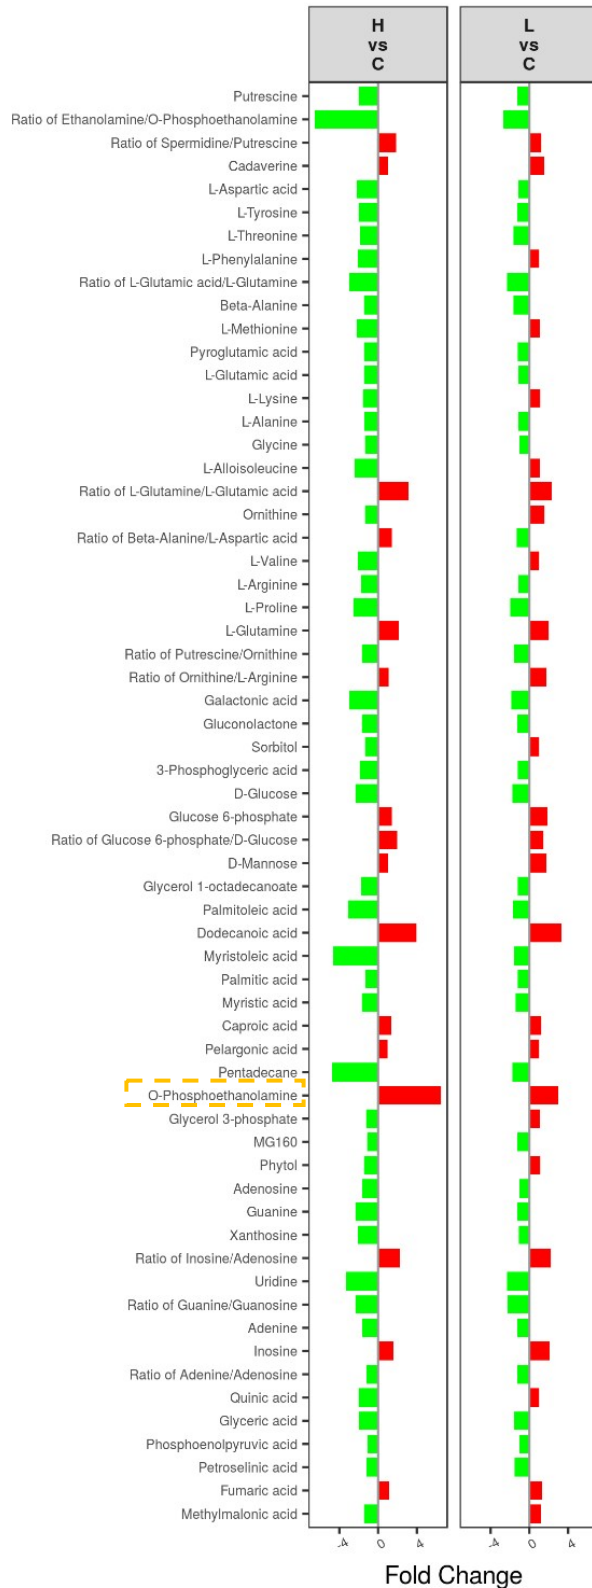

**Figure S7** Fold changes of differential metabolites in low- (L) and high-concentration (H) group vs control group (C). “C” refers to the control group. “L” and “H” refer to low and high concentrations of PS-NH<sub>2</sub>, respectively.





**Table S1** The strains and plasmids used in this study.

| <b>Strain</b> | <b>Relevant genotypes</b>                                   | <b>Reference</b> |
|---------------|-------------------------------------------------------------|------------------|
| PCC7942       | Wild-type                                                   |                  |
| JW11          | Same as wild-type, but $\Delta gp$                          | This work        |
| JW12          | <i>Ptrc::pssA</i> integrated at NSI                         | This work        |
| Plasmid       | Genotypes                                                   |                  |
| pUC18         | Amp <sup>R</sup> ; broad host range vector                  | Takara           |
| PSHG299       | Kan <sup>R</sup> ; plasmid containing kanamycin resistance  | Takara           |
| pAM2991       | Spec <sup>R</sup> ; NSI targeting vector; <i>Ptrc</i>       |                  |
| pGP1          | Amp <sup>R</sup> ; <i>gp</i> knockout vector                | This work        |
| pJW1          | Spec <sup>R</sup> ; NSI targeting vector; <i>Ptrc::pssA</i> | This work        |

**Table S2** Primers for construction of the mutant strains used in this study.

| <b>Primers</b> | <b>Sequences (5' - 3')</b>                                     |
|----------------|----------------------------------------------------------------|
| GP1            | GCCTGCAGGTCGACTCTAGAGGATCCAACCACGACTGGCCTGA<br>GGGCTACTTCGAA   |
| GP2            | GACGTTTCCCGTTGAATATGGCTCATGTAACCGCAGTAGGAGG<br>CCACGTTGACAATC  |
| GP3            | TCATTTGATGCTCGATGAGTTTTTCTAAGTCTTAGCCCGCTTCA<br>AGAGTGGCGTTGC  |
| GP4            | GACCATGATTACGAATTCGAGCTCGGTATCAGGTTCCGCAACA<br>CGGATTACCGTCGAT |
| GP5            | GATTGTCAACGTGGCCTCCTACTGCGGTTACATGAGCCATATTC<br>AACGGGAAACGTC  |
| GP6            | GCAACGCCACTCTTGAAGCGGGCTAAGACTTAGAAAACTCAT<br>CGAGCATCAAATGA   |
| GP7            | ATCGACGGTAATCCGTGTTGGCGAACCTGATACCGAGCTCGAA<br>TTCGTAATCATGGTC |
| GP8            | TTCGAAGTAGCCCTCAGGCCAGTCGTGGTTGGATCCTCTAGAG<br>TCGACCTGCAGGC   |
| YZ05           | CGATCGCTTTTACAGCAATGACAT                                       |
| YZ06           | ACCTCCTCAA AATTGTTTGCGCCTATC                                   |
| JW2            | CGGTACCCGGGGATCCATGTTGTCAA AATTTAAGCGTAAT                      |
| JW3            | CGACTCTAGAGGATCCTTACAGGATGCGGCTAATTA                           |

**Table S3** Metabolite annotation results for the study samples.

| <b>Terms</b>      | <b>Counts</b> |
|-------------------|---------------|
| Detected          | 153           |
| Annotated         | 82            |
| Metabolite Ratios | 20            |
| Unknowns          | 71            |





## Reference

1. Z. Dong, W. Zhang, Y. Qiu, Z. Yang, J. Wang and Y. Zhang, Cotransport of nanoplastics (NPs) with fullerene (C60) in saturated sand: Effect of NPs/C60 ratio and seawater salinity, *Water Res.*, 2018, **148**, 469-478.
